# Supplementary material for: A Miniaturized Pump Out Method for Characterizing Molecule Interaction with ABC Transporters
Source: MDPI journal article supplement (doi:10.3390/ijms20225529), 2019-11-06
Supplement: s1 [file s1]

| Compounds        |                                                 | 96 well plate format                             |              |                              |             | 384 well plate format                            |              |                              |              | Correlation 96 / 384 well plate format |      |                         |      |           |      |
|------------------|-------------------------------------------------|--------------------------------------------------|--------------|------------------------------|-------------|--------------------------------------------------|--------------|------------------------------|--------------|----------------------------------------|------|-------------------------|------|-----------|------|
|                  | Working<br>Conc.<br><i>Conc.</i><br><br>$\mu M$ | <i>k<sub>out</sub></i> Rho 123                   |              | <i>k<sub>out</sub></i> CMFDA |             | <i>k<sub>out</sub></i> Rho 123                   |              | <i>k<sub>out</sub></i> CMFDA |              | <i>Ratio K<sub>out</sub></i>           |      | Transporter Interaction |      |           |      |
|                  |                                                 | pmol.min <sup>-1</sup> .mg <sup>-1</sup> protein |              |                              |             | pmol.min <sup>-1</sup> .mg <sup>-1</sup> protein |              |                              |              | 96 / 384 wells                         |      | 96 wells                |      | 384 wells |      |
|                  |                                                 | <i>n</i>                                         | <i>mean</i>  | <i>n</i>                     | <i>mean</i> | <i>n</i>                                         | <i>mean</i>  | <i>n</i>                     | <i>mean</i>  | P-gp/BCRP                              | MRPs | P-gp/BCRP               | MRPs | P-gp/BCRP | MRPs |
| 1 verapamil      | 50                                              | 34                                               | 33.9 ± 7.0   | 8                            | 72.4 ± 6.6  | 16                                               | 39.3 ± 6.8   | 43                           | 67.8 ± 16.5  | 0.86                                   | 1.07 | +                       | +    | +         | +    |
| 2 elacridar      | 10                                              | 29                                               | 34.6 ± 8.9   | 8                            | 71.8 ± 6.6  | 16                                               | 42.5 ± 9.0   | 44                           | 56.4 ± 14.3  | 0.81                                   | 1.27 | +                       | +    | +         | +    |
| 3 MK571          | 50                                              | 24                                               | 70.9 ± 10.6  | 24                           | 25.0 ± 6.6  | 16                                               | 59.5 ± 9.9   | 44                           | 15.7 ± 5.8   | 1.19                                   | 1.59 | +                       | +    | +         | +    |
| 4 diazepam       | 50                                              | 29                                               | 115.2 ± 18.9 | 8                            | 89.2 ± 8.6  | 16                                               | 101.7 ± 14.6 | 44                           | 95.1 ± 14.1  | 1.13                                   | 0.94 | -                       | -    | -         | -    |
| 5 acetanomiphen  | 50                                              | 8                                                | 113.7 ± 12.6 | 8                            | 90.6 ± 6.8  | 16                                               | 105.4 ± 8.2  | 16                           | 119.1 ± 29.1 | 1.08                                   | 0.76 | -                       | -    | -         | -    |
| 6 amiodarone     | 50                                              | 8                                                | 91.1 ± 10.2  | 8                            | 83.7 ± 12.7 | 16                                               | 74.5 ± 12.4  | 16                           | 106.5 ± 17.6 | 1.22                                   | 0.79 | -                       | -    | +         | -    |
| 7 cyclosporinA   | 10                                              | 8                                                | 39.6 ± 9.9   | 8                            | 53.1 ± 7.6  | 16                                               | 46.4 ± 8.1   | 16                           | 42.2 ± 10.1  | 0.85                                   | 1.26 | +                       | +    | +         | +    |
| 8 diltiazem      | 50                                              | 8                                                | 51.7 ± 5.9   | 8                            | 96.4 ± 8.7  | 16                                               | 56.9 ± 7.1   | 16                           | 87.6 ± 24.1  | 0.91                                   | 1.10 | +                       | -    | +         | -    |
| 9 diclofenac     | 50                                              | 8                                                | 117.3 ± 15.6 | 8                            | 84.1 ± 7.5  | 16                                               | 91.5 ± 17.4  | 16                           | 118.7 ± 18.0 | 1.28                                   | 0.71 | -                       | -    | -         | -    |
| 10 loperamide    | 50                                              | 8                                                | 42.0 ± 4.9   | 8                            | 72.9 ± 4.0  | 16                                               | 41.6 ± 6.2   | 16                           | 61.2± 16.2   | 1.01                                   | 1.19 | +                       | +    | +         | +    |
| 11 doxorubicin   | 20                                              | 8                                                | 66.7 ± 11.0  | 8                            | 66.6 ± 5.6  | 16                                               | 64.7 ± 6.8   | 16                           | 81.3 ± 16.6  | 1.03                                   | 0.82 | +                       | +    | +         | -    |
| 12 phenobarbital | 50                                              | 8                                                | 107.1 ± 10.0 | 16                           | 96.6 ± 11.6 | 16                                               | 98.5 ± 7.4   | 16                           | 94.2 ± 22.4  | 1.09                                   | 1.03 | -                       | -    | -         | -    |
| 13 quinidine     | 50                                              | 8                                                | 36.4 ± 4.2   | 8                            | 77.6 ± 8.9  | 16                                               | 45.8 ± 6.7   | 32                           | 84.7 ± 16.9  | 0.79                                   | 0.92 | +                       | +/-  | +         | -    |
| 14 rifampicin    | 50                                              | 8                                                | 66.8 ± 4.4   | 8                            | 75.5 ± 7.9  | 16                                               | 59.5 ± 8.0   | 16                           | 76.3 ± 21.5  | 1.12                                   | 0.99 | +                       | +/-  | +         | +/-  |
| 15 vinblastine   | 50                                              | 8                                                | 57.6 ± 3.8   | 8                            | 77.6 ± 10.6 | 16                                               | 57.9 ± 7.6   | 32                           | 81.9 ± 17.5  | 0.99                                   | 0.95 | +                       | +/-  | +         | -    |
| 16 tocopherol    | 10                                              | 8                                                | 33.7 ± 2.7   | 8                            | 88.4 ± 6.9  | 16                                               | 44.6 ± 6.2   | 32                           | 88.8 ± 15.33 | 0.76                                   | 1.00 | +                       | -    | +         | -    |
